# Supplementary material
Source: Research Square preprint supplement (doi:10.21203/rs.3.rs-8078027/v1)
Supplement: Supplementary file 1 [file 6645b9d8fc43eeeb529f7b24.docx]

**Appendix: Survey on the Impact of Mindfulness on Employee Voice Behavior in Construction Project Teams**

**[Part I: Basic Information]**

1. Your gender is: □Male □Female
2. Your age is: □25 and under □26 to 35 □36 to 45 □46 and over
3. Your education level is: □College and below □Bachelor's degree □Master's degree
4. Your position is: □Engineering Management Post □Technical Quality Post □Commercial Contract Post □Safety Management Post □Material Management Post □General Office Post □ Finance Post
5. Size of your team: □15 and under □16 to 25 □26 to 35 □35 and over
6. Your length of time with the team is: □3 months and under □4 to 6 months □ 7 to 12 months □1~2 years □2~3 years □more than 3 years

**[Part II: Questionnaire - Mindfulness]**

The following question describes "mindfulness" Based on your understanding of the project manager of your current or previous team, please select the option you believe is most appropriate.

| serial number | There is no right or wrong answer to any of the following questions. | Completely Inconsistent | Somewhat Inconsistent | neutrality | Somewhat Consistent | Completely Consistent |
| --- | --- | --- | --- | --- | --- | --- |
|  | **Attention** |  |  |  |  |  |
| 1 | When interacting with others at work, I remain fully focused on the other person and actively listen. | 1 | 2 | 3 | 4 | 5 |
| 2 | In the workplace, I am quick to notice when my mind starts to wander, and I can consciously redirect my thoughts to focus effectively on the task at hand. | 1 | 2 | 3 | 4 | 5 |
| 3 | While working, I maintain an unwavering focus on the task at hand without allowing distractions to interfere. | 1 | 2 | 3 | 4 | 5 |
| 4 | I acknowledge and accept my thoughts and feelings at work without generating internal conflict. | 1 | 2 | 3 | 4 | 5 |
| 5 | I consistently reflect on my thoughts and remind myself that my perspective on work may be biased, allowing for more accurate judgments. | 1 | 2 | 3 | 4 | 5 |
| 6 | In the workplace, I am adept at articulating my viewpoints, expressing my emotional state, and conveying my expectations for problem-solving outcomes. | 1 | 2 | 3 | 4 | 5 |
|  | **Honesty** |  |  |  |  |  |
| 7 | My inner integrity and moral principles significantly influence my behavior and decision-making in the workplace. | 1 | 2 | 3 | 4 | 5 |
| 8 | When faced with ethical dilemmas at work, I typically opt for actions that align with ethical standards rather than sacrificing moral principles. | 1 | 2 | 3 | 4 | 5 |
| 9 | I can accept and understand others' viewpoints and beliefs in a non-judgmental manner at work, without hastily passing judgment on right or wrong. | 1 | 2 | 3 | 4 | 5 |
| 10 | I possess a resilient will to maintain inner integrity, enabling me to effectively handle challenges and resist temptation in the workplace. | 1 | 2 | 3 | 4 | 5 |
|  | **Conviction** |  |  |  |  |  |
| 11 | In a tense work environment, I lack composure and fail to "think twice before acting." (r) | 1 | 2 | 3 | 4 | 5 |
| 12 | I tend to have a quick temper and am easily influenced by my own negative emotions in the workplace. (r) | 1 | 2 | 3 | 4 | 5 |
| 13 | While I meet deadlines for tasks at work, I merely scratch the surface and lack a personal understanding of the tasks. (r) | 1 | 2 | 3 | 4 | 5 |
| 14 | When encountering unpleasant situations at work, I am adept at disguising my feelings and keeping them hidden. | 1 | 2 | 3 | 4 | 5 |

**[Part III: Questionnaire - other variables]**

The following question describes "voice behavior" Please select the option that best fits your preferences.

| serial number | There is no right or wrong answer to any of the following questions. | Completely Inconsistent | Somewhat Inconsistent | neutrality | Somewhat Consistent | Completely Consistent |
| --- | --- | --- | --- | --- | --- | --- |
|  | **Altruism and Self-interest** |  |  |  |  |  |
| 1 | I can propose new suggestions and solutions to advance project progress and enhance everyone's productivity. | 1 | 2 | 3 | 4 | 5 |
| 2 | I believe offering suggestions at work benefits everyone, and I am willing to openly voice my opinions and encourage others to do the same. | 1 | 2 | 3 | 4 | 5 |
| 3 | In my work, I am more focused on suggestions that are relevant to myself rather than considering the overall perspective. (r) | 1 | 2 | 3 | 4 | 5 |
| 4 | I am willing to engage in discussions related to work quality. | 1 | 2 | 3 | 4 | 5 |
|  | **Indirect and Direct Approaches** |  |  |  |  |  |
| 5 | In my work, I don't point out issues directly in front of others. Instead, I offer suggestions to managers or colleagues privately, using a diplomatic approach to avoid embarrassment. | 1 | 2 | 3 | 4 | 5 |
| 6 | I am open to publicly supporting constructive criticism in the workplace when it is justified. | 1 | 2 | 3 | 4 | 5 |
| 7 | I am not afraid to openly criticize unreasonable systems and policies that hinder the work process. | 1 | 2 | 3 | 4 | 5 |
| 8 | To achieve the desired outcome of my suggestions, I am willing to directly address issues in the workplace, even if it affects my relationship with managers or colleagues. | 1 | 2 | 3 | 4 | 5 |
| 9 | I employ various methods to propose suggestions to supervisors in the workplace, aiming to demonstrate the validity of my ideas. | 1 | 2 | 3 | 4 | 5 |
|  | **Reasonableness of Reasons** |  |  |  |  |  |
| 10 | In my work, I consistently engage in thorough analysis and root cause identification before expressing my viewpoints. If I'm not confident, I refrain from expressing opinions hastily. | 1 | 2 | 3 | 4 | 5 |
| 11 | I persistently follow up on issues where I've provided input. | 1 | 2 | 3 | 4 | 5 |
| 12 | The solutions I propose at work are often deemed impractical. (r) | 1 | 2 | 3 | 4 | 5 |

This question describes "role engagement" Please select the option that best fits your perspective.

| serial number | There is no right or wrong answer to any of the following questions. | Completely Inconsistent | Somewhat Inconsistent | neutrality | Somewhat Consistent | Completely Consistent |
| --- | --- | --- | --- | --- | --- | --- |
| 1 | I have invested a lot of energy into my work and consistently demonstrated excellent performance. | 1 | 2 | 3 | 4 | 5 |
| 2 | I will remain at the project site until the tasks are completed before leaving. | 1 | 2 | 3 | 4 | 5 |
| 3 | I take unfinished work issues home to address them. | 1 | 2 | 3 | 4 | 5 |
| 4 | I feel that time flies by when I'm working. | 1 | 2 | 3 | 4 | 5 |
| 5 | I thoroughly enjoy my job and am passionate about it. | 1 | 2 | 3 | 4 | 5 |

This question describes "promotion focus" Please select the option that best fits your perspective.

| serial number | There is no right or wrong answer to any of the following questions. | Completely Inconsistent | Somewhat Inconsistent | neutrality | Somewhat Consistent | Completely Consistent |
| --- | --- | --- | --- | --- | --- | --- |
| 1 | I often contemplate my career and opportunities for professional growth. | 1 | 2 | 3 | 4 | 5 |
| 2 | I focus on the future direction of my work. | 1 | 2 | 3 | 4 | 5 |
| 3 | I maintain optimism about my future career. | 1 | 2 | 3 | 4 | 5 |
| 4 | My primary goal is to achieve my career aspirations. | 1 | 2 | 3 | 4 | 5 |
| 5 | I strive to become my authentic self, which entails becoming confident, self-respecting, and self-sufficient. | 1 | 2 | 3 | 4 | 5 |
| 6 | I am proactive and do not favor conservative strategies aimed at minimizing losses. | 1 | 2 | 3 | 4 | 5 |

The survey is complete. Thank you once again for taking the time to assist us amidst your busy schedule!
